# Supplementary material
Source: publisher figshare collection journal article supplement (https://frontiersin.figshare.com/ndownloader/files/21207900)
Supplement: Supplementary file [file 21207900]

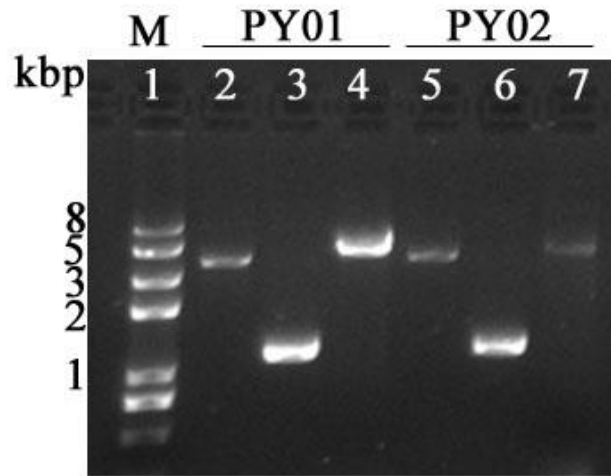

**Figure S1 PCR analysis showing the integration of the *pyrG::cyp51A<sup>point mutation</sup>* fragment into the genome at the original *cyp51A* locus in the PY01 or PY02 strains.**

For lanes 2 and 5, the primers *cyp51A*-F1 and *Diag-Ncpyr4*-3' were used to determine whether there was a homologous recombination to replace *cyp51A* with *pyrG::cyp51A<sup>point mutation</sup>* fragment in the genome of PY01 or PY02, and the expected size is 3686 bp; For lanes 3 and 6, primers *Diag-Ncpyr4*-5' and P6 were used to determine whether there was a homologous recombination to replace *cyp51A* with *pyrG::cyp51A<sup>point mutation</sup>* fragment in the genome of PY01 or PY02, and the expected size is 1133 bp; For lanes 4 and 7, primers *cyp51A*-F and *cyp51A*-R2 were used to determine whether wild-type gene *cyp51A* still exists in the genome of PY01 or PY02, and the expected size of wild-type gene *cyp51A* is 2113 bp, and the expected size of *pyrG::cyp51A<sup>point mutation</sup>* is 4321 bp. In lanes 2-4, genomic DNA of PY01 was used as a PCR template; for lanes 5-7, genomic DNA of PY02 was used as a PCR template.

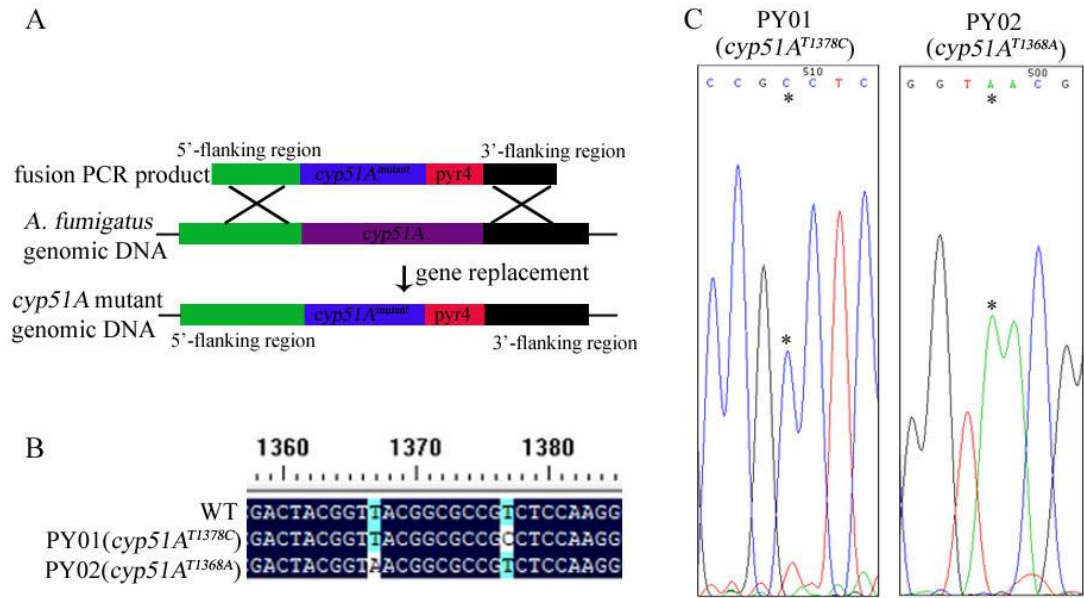

**Figure S2 The construction of point mutations PY01 (*cyp51A*<sup>N248K/V436A</sup>) and PY02 (*cyp51A*<sup>Y433N</sup>)**

**and sequencing analysis for *cyp51A* gene.** (A) Diagram showing the gene replacement strategy for mutations. (B, C) The *cyp51A* gene sequencing analysis showing expected mutation sites in the PY01 and PY02 strains. Asterisk (C) show mutation sites.

TABLE S1 Primers used in this study

| Primer name    | DNA sequence 5'-3'                          |
|----------------|---------------------------------------------|
| cyp51A-F1      | CTCAGGACTTTCTTCTAACCACCAT                   |
| cyp51A-R1      | TACAGTCATTTATTAGGCCCTCGAG                   |
| cyp51A-F2      | GCAGCACCACTTCAGAGTTGTCTAG                   |
| cyp51A-R2      | AGTATAGGCAACAACACTTCAGGGC                   |
| P2             | AAGACTTGGCTTAGCTCCCTTACCG                   |
| P3             | GTAACGCCAGGGTTTTCCAGTCTCACTTGGATGTGTTTTTCG  |
| P4             | TGCTCTGATGCCGCATAGTTGTAACCATCGAGGACTTCAAAGG |
| P5             | CCGTCCACGTATGACATGCATATG                    |
| P6             | TCTCGTGTGACTATGACCCCGT                      |
| Pyr4-up        | GGAAAACCTGGCGTTAC                           |
| Pyr4-down      | CTATGCGGCATCAGAGCA                          |
| Diag-Ncpyr4-5' | GTTGCATTTCGATAAGTAGCCAGTTC                  |
| Diag-Ncpyr4-3' | GTCTTGAGGACGACAATCGA                        |

TABLE S2 *A. fumigatus* strains used in this study

| Strain             | Genotype                                                         | Reference or source  |
|--------------------|------------------------------------------------------------------|----------------------|
| ATCC MYA-3626      | NA                                                               | ATCC                 |
| NO.3               | NA                                                               | This study           |
| NO.7               | NA                                                               | This study           |
| A1160 <sup>e</sup> | $\Delta ku80$ ; A1160::pyrG; veA1                                | (Jiang et al., 2014) |
| A1160              | $\Delta ku80$ ; pyrG; veA1                                       | FGSC                 |
| PY01               | $\Delta ku80$ ; pyrG; cyp51A <sup>N248K/V436A</sup> ::pyr4; veA1 | This study           |
| PY02               | $\Delta ku80$ ; pyrG; cyp51A <sup>Y433N</sup> ::pyr4; veA1       | This study           |

FGSC: Fungal Genetics Stock Center (<http://www.fgsc.net/>); NA: not applicable; ATCC: American Type Culture Collection.
